# Supplementary material for: Optogenetic control of the Dab1 signaling pathway
Source: PubMed Central journal article supplement (PMC5363252; doi:10.1038/srep43760), 2017-03-08
Supplement: srep43760-s8.pdf [file srep43760-s8.pdf]

**Supplementary material for  
Optogenetic control of the Dab1 signaling pathway**

Liang Wang and Jonathan A. Cooper \*

Division of Basic Sciences, Fred Hutchinson Cancer Research Center, 1100 Fairview Ave H,  
Seattle, Washington 98109, USA.

\*Corresponding author: [jcooper@fhcrc.org](mailto:jcooper@fhcrc.org)

**Supplementary Information**

Supplementary Information (text, tables and images) should be combined and supplied as a single file, preferably in PDF format.

**Supplementary Fig. S1.** Western blot analysis of phosphorylation level of opto-Dab1-mCh or opto-Dab1<sup>5F</sup>-mCh. HEK293 cells expressing of opto-Dab1-mCh or opto-Dab1<sup>5F</sup>-mCh were starved in serum-free medium for 15 hours, then left in the dark environment or illuminated by a LED array for 30 min (on/off, 0.05 s/12 s). Cell lysates were analyzed by Western blotting, probing with 4G10 anti-pY and anti-mCherry monoclonal antibodies.

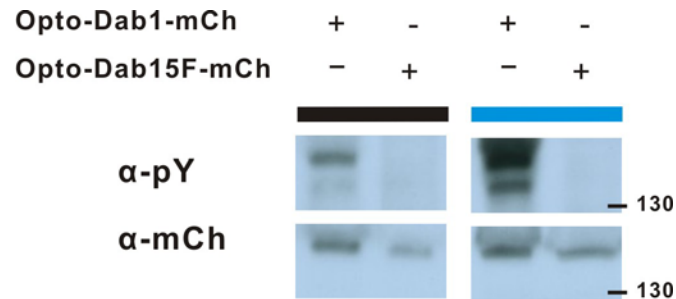

**Supplementary Fig. S2.** (A) Serum-starved COS7 cells expressing Akt-PH-mCh only were imaged before (0 s) and after 800 s of global blue light illumination (8 s/frame). (B) Reversible activation of PI3K in COS7 cells. TIRF imaging of PI3K activation during blue light irradiation of opto-Dab1-GFP. TIRF images were taken at the end of each activation/relaxation period. (C) Opto-Dab1<sup>5F</sup>-FP mutant cannot recruit Crk-SH2-mCh probe. Cells expressing opto-Dab1<sup>5F</sup>-EYFP and Crk-SH2-mCh were illuminated at 488 nm. (D) Protrusion can be induced by local irradiation at different sites in a single cell. Different spots (~ 6.6  $\mu$ m diameter, white circles) were illuminated (488 nm, 0.2 Hz) on the edges of a serum-starved COS7 cell co-expressing opto-Dab1-EYFP and Akt-PH-mCh. Confocal images of the Akt-PH-mCh signal at the end of each light or dark period are shown. Scale bars: 10  $\mu$ m.

Fig S2 (legend on previous page)

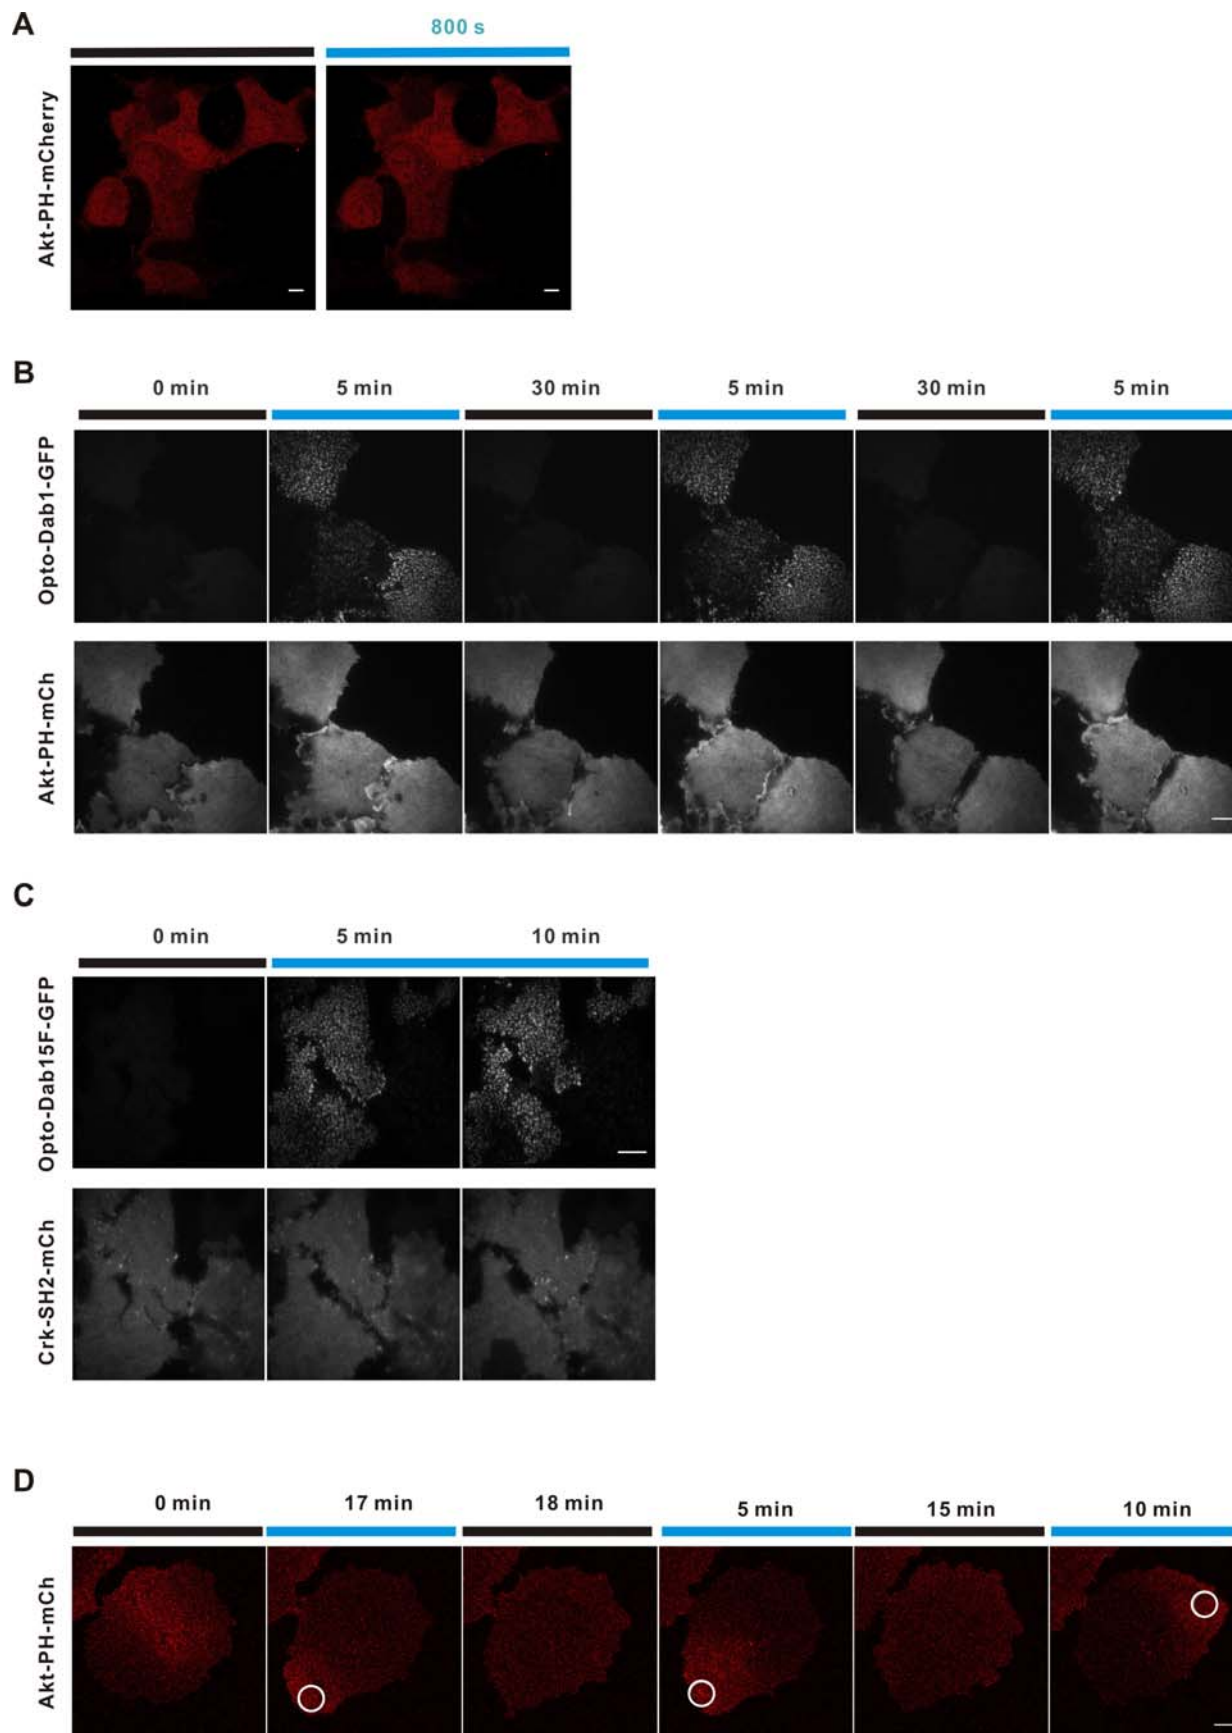

**Supplementary Fig. S3.** Phosphorylation of opto-Dab1-mCh induced by blue light in primary cortical neurons. Cortical neurons were prepared, nucleofected with opto-Dab1-mCh, and seeded on coverslips. Two days later, the neurons were starved in B27-free medium for 6 hours. Then the neurons were treated with 0.5  $\mu$ M wortmannin or 10  $\mu$ M PP2 or untreated and subjected to dark environment (in an incubator) or irradiation by a blue light LED array for 20 min (on/off; 0.05 s/10 s). Cell lysates were analyzed by Western blotting with anti-pY and anti-mCherry antibodies. The arrow indicates pY opto-Dab1-mCh.

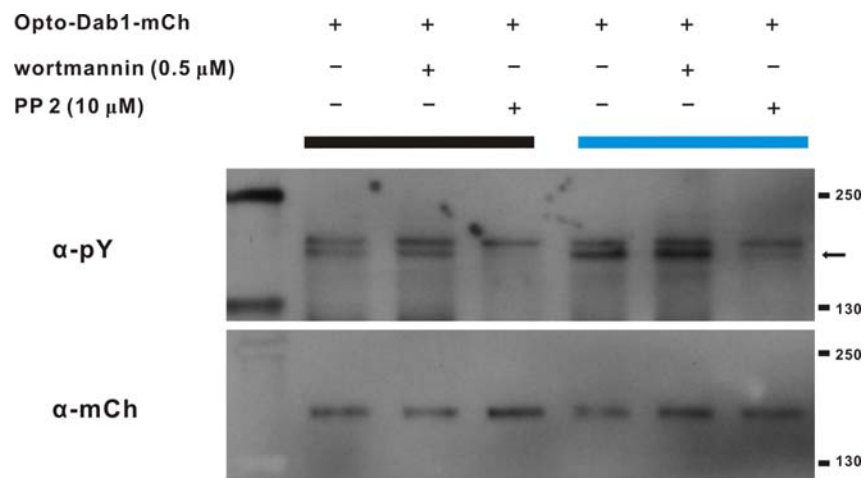

**Supplementary movie S1** Protrusion induced by local activation of opto-Dab1-mCh near the edge of a COS7 cell.

**Supplementary movie S2** Protrusion/Retraction induced by local activation/relaxation of opto-Dab1-mCh near the edge of a COS7 cell.

**Supplementary movie S3** Local activation of opto-Dab1<sup>5F</sup>-mCh near the edge of a COS7 cell induced opto-Dab1 translocation but no protrusion or ruffling.

**Supplementary movie S4** Induction of NIH3T3 cell migration by repeated local activation. 01: cell expressing opto-Dab1-EYFP and Lifeact-mCh (which is shown in red fluorescence channel). 02: cell expressing opto-Dab1-mCh only.

**Supplementary movie S5** Protrusion induced by local activation of opto-Dab1-mCh near a neuron cell body.

**Supplementary movie S6** Protrusion induced by local activation of opto-Dab1-mCh at a neurite.

**Supplementary movie S7** Activation and relaxation experiment in an early stage neuron expressing opto-Dab1-mCh.
